## Temporal Silencing of an Androgenic Gland-Specific Insulin-Like Gene Affecting Phenotypical Gender Differences and Spermatogenesis

Tomer Ventura, Rivka Manor, Eliahu D. Aflalo, Simy Weil, Shaul Raviv, Lilah Glazer, and Amir Sagi

Department of Life Sciences and the National Institute for Biotechnology in the Negev, Ben-Gurion University of the Negev, Beer-Sheva 84105, Israel

Androgenic glands (AGs) of the freshwater prawn *Macrobrachium rosenbergii* were subjected to endocrine manipulation, causing them to hypertrophy. Transcripts from these glands were used in the construction of an AG cDNA subtractive library. Screening of the library revealed an AG-specific gene, termed the *M. rosenbergii* insulin-like AG (*Mr-IAG*) gene. The cDNA of this gene was then cloned and fully sequenced. The cysteine backbone of the predicted mature Mr-IAG peptide (B and A chains) showed high similarity to that of other crustacean AG-specific insulin-like peptides. *In vivo* silencing of the gene, by injecting the prawns with *Mr-IAG* double-stranded RNA, temporarily prevented the regeneration of male secondary sexual characteristics, accompanied by a lag in molt and a reduction in growth parameters, which are typically higher in males of the species. In terms of reproductive parameters, silencing of *Mr-IAG* led to the arrest of testicular spermatogenesis and of spermatophore development in the terminal ampullae of the sperm duct, accompanied by hypertrophy and hyperplasia of the AGs. This study constitutes the first report of the silencing of a gene expressed specifically in the AG, which caused a transient adverse effect on male phenotypical gender differences and spermatogenesis. (***Endocrinology* 150: 1278–1286, 2009**)

Ever since it was first proposed as the source of a hypothetical masculinizing hormone in crustaceans, the androgenic gland (AG) has been studied thoroughly in many crustacean species. The consensus emerging from these studies is that the AG plays a unifying role in the bewilderingly varied sex differentiation mechanisms in crustaceans (1–5).

The AG constitutes a feature unique to male crustaceans in that it is an organ regulating sex differentiation separated from the gametogenic organ (unlike the single organ of vertebrate species). This separation enables manipulation of sex differentiation without affecting the gonads (6). In decapod male crustaceans, there are two AGs, each attached to the ejaculatory region of a vas deferens.

In research spanning several decades, the functioning of the AG was investigated in a number of crustacean species by following the morphological and physiological effects of AG removal or transplantation on primary and secondary sex characteristics. In the amphipod *Orchestia gamarella*, for example, bilateral AG ablation decreased spermatogenesis and prevented

the development of secondary male characteristics (7). In the crayfish *Procambarus clarkii*, injection of AG extracts accelerated the development of external male characteristics (8). In the giant freshwater prawn, *Macrobrachium rosenbergii*, a degree of masculinization was recorded in AG-implanted females (9). In the same species, fully functional sex reversal from males to neo-females (10) and from females to neo-males (11) was achieved by bilateral AG ablation and transplantation, respectively. The possibility of sex reversal has economical implications for the farming of this sexually dimorphic species because males grow faster than females (12).

It is currently widely accepted that the AG of decapod crustaceans secretes the hormone(s) responsible for male differentiation, with a high probability of such a hormone(s) being proteinaceous in nature (13). This premise is supported by a histological study in the shore crab *Phachygrapsus crassipes* (14).

Multicellular organisms express various insulin-like peptides differentially. The insulin-like peptides discovered in inverte-

ISSN Print 0013-7227 ISSN Online 1945-7170  
Printed in U.S.A.

Copyright © 2009 by The Endocrine Society

doi: 10.1210/en.2008-0906 Received June 17, 2008. Accepted October 28, 2008.

First Published Online November 6, 2008

Abbreviations: AG, Androgenic gland; CHH, crustacean hyperglycemic hormone; dsRNA, double-stranded RNA; GFP, green fluorescent protein; hAG, hypertrophy and hyperplasia of the androgenic gland; *Mr-IAG*, *Macrobrachium rosenbergii* insulin-like androgenic gland gene; RNAi, RNA interference; *T7P*, T7 promoter site at the 5' of one primer; UTR, untranslated region; XO-SG, X-organ sinus gland complex.

brates to date are not confined to carbohydrate metabolism: they play a variety of roles in metabolism, growth, and reproduction. Because Crustacea are believed to be the ancestors of insects (15), cumulative evidence for AG-specific insulin-like peptides may thus imply that these peptides have evolved in the context of sex differentiation in arthropods.

Most insulin-like genes, with the exception of IGFs, encode a single pre-pro-peptide with a signal peptide and contiguous B, C, and A peptides. The pro-peptide is processed into its active form by the formation of two interchain disulfide bridges linking the A and B peptides and an intrachain disulfide bridge linking two cysteine residues within the A chain, followed by proteolytic cleavage of the C peptide (16). Insulin-like peptide families have been reported for a variety of invertebrates. In the nematode *Caenorhabditis elegans*, 10 insulin-like peptides have been divided into three distinct families. Insulin-like peptides from two of these families probably contain an additional disulfide bond (17), as was suggested to be the case for the three isopod insulin-like AG factors described below (18). Seven IGFs are expressed in the brain and digestive system of the freshwater snail *Lymnaea stagnalis*; these proteins function in shell and body growth and in energy metabolism (19). Three insulin-like prothoracicotropic hormones (bombyxin I, II, and III), expressed in the brain of the silkworm *Bombyx mori*, regulate molt (20). In Crustacea the first AG hormone to be reported was found in isopods; it was assigned to the insulin family of hormones because it possesses B and A chains with a skeleton of conserved cysteine residues, separated by a C peptide that is present in the pro-hormone but undergoes cleavage to contribute to the mature hormone (18, 21–25). Extensive efforts to discover orthologous genes, through the use of sequence similarity and RT-PCR, in the important group of decapod species have come to nothing. Only recently did the establishment of an AG cDNA subtractive library in the decapod crayfish *Cherax quadricarinatus* reveal an insulin-like gene (26).

Because the AG has an enormous effect on primary and secondary male characteristics, it is considered not only as a male sex differentiation-regulating organ but also as an organ responsible for the maintenance of male morphological and anatomical features. Sun *et al.* (27) hypothesized that two polypeptides (~16 and ~18 kDa) found in the AG of sexually mature *M. rosenbergii* males could be AG hormones. They based their premise on size similarity to the AG hormone found in Isopoda (for which the pre-pro AG hormone is ~17 kDa) but provided neither functional nor structural evidence.

The discovery of the RNA interference (RNAi) phenomenon has revolutionized functionality assays of newly discovered genes in many fields (28). Recently, RNAi was applied by injecting different decapod crustaceans with double-stranded RNA (dsRNA) specific to the gene of interest to clarify the function of a number of gene products (29–32). Among those genes is the gene expressing a crustacean hyperglycemic hormone (CHH), which was silenced by *in vivo* dsRNA injections into adult shrimps. The silencing of the CHH gene reduced both CHH and hemolymph glucose levels (30). Another gene that has been silenced *in vivo* is the molt-inhibiting hormone gene, demonstrating a pleiotropic activity because the molt-inhibiting hor-

mon silencing also implied a gonad-stimulating activity (32). The insulin gene was successfully silenced in mice through administration of small interfering RNA both *in vivo* and *in vitro* (33). However, the present study is the first instance in which the functionality of a conceptually novel insulin-like peptide has been elucidated *in vivo* through an RNAi assay.

In this study we identified a novel gene encoding an insulin-like peptide that is specifically expressed in the AG cells of *M. rosenbergii*, termed *M. rosenbergii* insulin-like AG (*Mr-IAG*) (data bank accession no. FJ409645). Silencing of its mRNA through RNAi temporarily prevented the regeneration of male secondary sexual characteristics (typical male growth patterns and presence of the *appendix masculina*), accompanied by the arrest of testicular spermatogenesis, the absence of spermatozoa in the sperm duct, and hypertrophy and hyperplasia of the AG (hAG).

## Materials and Methods

### Animals

*M. rosenbergii* males were maintained at Ben-Gurion University of the Negev under the following conditions. Food comprising shrimp pellets (Rangen Inc., Buhl, ID; 30% protein) was supplied *ad libitum* three times a week. Water quality was ensured by circulating the entire volume through a bio-filter maintaining all the water physicochemical parameters as described before (34).

### Construction of a cDNA library of the AG by using suppression subtractive hybridization

Endocrine manipulation was achieved by removal of the X-organ sinus gland complex (XO-SG), causing hAG, as described previously for other crustacean species (34–36). This endocrine manipulation facilitates the extraction of the AGs because it promotes AG growth and, therefore, makes the glands easier to handle. The procedure was performed on 15 sexually mature male prawns (each weighing 35–80 g). Total RNA isolation, cDNA preparation, and preparation of the subtraction library of the AG were performed as previously described by Manor *et al.* (26), with the cDNA from 30 hAGs as the tester and the cDNA from other peripheral glands (a mix of mandibular and Y-organs) as the driver. After two hybridization cycles, unhybridized cDNAs, representing genes that are expressed in the AG but are absent from the driver, were amplified by two PCRs. The primary (24 cycles) and secondary (12 cycles) PCRs were performed according to recommendations in the manufacturer's manual (Fermentas, Ontario, Canada), and the PCR products were cloned into the pGEM-T easy vector (Promega Corp., Madison, WI) electroporatically transformed into competent bacteria. Clones containing the inserts were isolated and grown overnight. Plasmid DNA was purified using a miniprep kit (QIAGEN, Hilden, Germany), and the inserts were sequenced.

### Sequencing of *Mr-IAG* factor

The complete *Mr-IAG* sequence was obtained by 3' and 5' rapid amplification of cDNA ends, performed with the Clontech Smart Race kit (Clontech Laboratories, Inc., Mountain View, CA), according to the manufacturer's protocol. PCR was performed with the gene-specific forward primer 5'-GAGCAGGGAA GAAGCGAACAATATGCTG-3' (nt 575–602) and a reverse primer from the 3' Race kit, the gene-specific reverse primer 5'-GCCAAGTATAGGACAGGGACGGGATGAT-3' (nt 768–795; see Fig. 2) and the Universal Primers Mix (BD Biosciences, San Jose, CA) provided in the 5' Race kit. The PCR products were cloned and sequenced as described previously.

## Bioinformatic analyses

To enhance the quality of the selected expressed sequence tags, the obtained cDNA sequences were first stripped of low-quality, vector and primer sequences using Sequencher software (Gene Codes Corp., Ann Arbor, MI), followed by clustering and assembly. The resulting contigs and singlets were unified, and their sequences were compared with those in the Universal Protein Resource database (Swiss-Prot + TrEMBL from 18.5.05; European Bioinformatics Institute, Cambridge, UK), using a local installation of National Center for Biotechnology Information's Basic Alignment Search Tool algorithm. The full length of one of the cDNA sequences, *Mr-IAG*, was computationally translated with the ExPASy Proteomics Server (<http://ca.expasy.org/tools/dna.html>), and the most likely frame was selected (5'→3' Frame 2). The deduced amino acid sequence was further assessed by SMART (<http://smart.embl-heidelberg.de/smart>) and CBS Prediction Servers (<http://www.cbs.dtu.dk/services>). Multiple sequence alignment of the predicted Mr-IAG B and A chain sequences with the B and A chain sequences of the three AG hormones known in Isopoda (18, 24) and with the *C. quadricarinatus* insulin-like AG factor, designated Cq-IAG (26), was performed with CLUSTAL W (37). A phylogram of the five crustacean insulin-like mature sequences was created with a random number generator seed of 111 and 1000 bootstrap trials, using CLUSTAL\_X (38), and viewed by Tree-View (39).

## *Mr-IAG* tissue-specific expression

### RT-PCR

cDNA was prepared by a reverse-transcriptase reaction containing 1 μg total RNA, extracted from mature males (AG, hAG, sperm duct, testis, peripheral glands, muscle, hepatopancreas, and thoracic ganglia), and Moloney murine leukemia virus reverse-transcriptase H minus (Promega), according to the manufacturer's instructions. The cDNA was then amplified by PCR, as previously described by Manor et al. (26), and *Mr-IAG* tissue-specific expression was demonstrated using forward (5'-GACAGC GTGAGGAGAA GTCC-3', nt 627–646) and reverse (5'-TATAGGACAGGGACGGGATG-3', nt 770–789) *Mr-IAG* specific primers. *M. rosenbergii* β-actin, accession no. AF221096 (40), was adopted as a positive control using specific forward (5'-GA GACCT-TCAACACCCCAGC-3') and reverse (5'-TAGGTGGTCTCGT-GAATG CC-3') primers. *M. rosenbergii* sperm duct specifically expressed gene *Mar-SRR*, accession no. DQ066890 (41), was used as the internal control using specific forward (5'-TCTCTGAAGCTGCAAGT-GAT TTAC-3') and reverse (5'-AATCT GGGTCATTCTCCTGAT TGG-3') primers. RT-PCR products were electrophoresed in 1.2% agarose, and visualized by exposure to UV light and ethidium bromide.

### Northern blot analysis

Total RNA was isolated from the sperm duct, testis, muscle, hepatopancreas, and hAG of mature males. Five micrograms of RNA from each organ were electrophoresed on a 1% agarose formaldehyde gel, transferred to a nitrocellulose membrane, and UV cross-linked. The membrane was prehybridized overnight (42) and radiolabeled with a <sup>32</sup>P probe prepared by adding γ<sup>32</sup>P-deoxycytidine triphosphate (Amersham Biosciences Inc., Piscataway, NJ), together with a *Mr-IAG* PCR product (nt 680–842), to a random priming labeling mix (Biological Industries, Beit Haemek, Israel). The blot was incubated overnight in hybridization buffer containing <sup>32</sup>P-labeled DNA. The membrane was washed as described by Shechter et al. (42) and exposed to BioMax MS Kodak film (Eastman Kodak Co., Rochester, NY) with intensifying screens at –80 C for 2.5 h. rRNA was visualized with ethidium bromide and UV light.

### In situ hybridization

hAGs were dissected out together with the attached terminal ampullae from endocrinologically induced males 9 d after induction. Tissue samples were fixed in modified Carnoy's II for 48 h and dehydrated gradually through a series of increasing alcohol concentrations. Tissues were cleared and embedded in Paraplast (Kendall, Mansfield, MA) ac-

ording to conventional procedures. Sections of 5 μm were cut onto silane-coated slides (Menzel-Gläser, Braunschweig, Germany). Consecutive sections were used for hybridization with sense and antisense probes, and for morphological observations (staining hematoxylin and eosin). Digoxigenin-labeled oligonucleotides for antisense and sense probes corresponding to nucleotides 29–1745 of *Mr-IAG* cDNA were synthesized using SP6 and T7 RNA polymerases, and the probes were hydrolyzed to reduce their length to approximately 200 bases, as described in the *Digoxigenin Application Manual* (Roche Applied Science, Indianapolis, IN). Hybridization was performed as described previously by Shechter et al. (42), with the slight modification of adding 100 μg/ml tRNA to the hybridization solution.

### dsRNA preparation

PCR products of plasmids containing green fluorescent protein (GFP) or *Mr-IAG* open-reading frame, primed by two gene-specific primers with T7 promoter site at the 5' of one primer (T7P) (5'-TAATAC GACTCACTATAGGG-3'), were used as templates for RNA synthesis. Primer pairs used were as follows. For *Mr-IAG* sense RNA synthesis: primer T7P forward (5'-T7PATGGGATA CTGGAATGCCGAG-3') vs. primer reverse (5'-CTGGAAGTGCAGGTGTTAACG-3'). For *Mr-IAG* antisense RNA synthesis: primer forward (5'-ATGGGATACTGGAATGCCGAG-3') vs. primer T7P reverse (5'-T7PCTGGAACTGCAGGTGTTAACG-3'). For GFP sense RNA synthesis: primer T7P forward (5'-T7PATGGTGTGAG CAAGGGCGAG-3') vs. primer reverse (5'-TGTA-CAGCTCG TCCATGCC-3'). For GFP antisense RNA synthesis: primer forward (5'-ATGGTGAGCAAGG GCGAG-3') vs. primer T7P reverse (5'-T7PTGTACAGCTCGTCCATGCC-3'). PCR amplicons were electrophoresed on a 1.2% agarose gel, visualized with ethidium bromide and UV light, excised from the gel, and purified with a QIAquick PCR Purification Kit (QIAGEN). Single-stranded RNA was synthesized with MEGAscript T7 kit (Ambion, Inc., Austin, TX) according to the manufacturer's instructions. RNA was quantified and diluted to 1 μg/μl, and then the two strands were hybridized by heating to 70 C for 10 min, followed by room temperature incubation for 10 min. dsRNA quality was assessed on an agarose gel; dsRNA was kept at –20 C until used.

### In vivo *Mr-IAG* silencing

For the preliminary short-term *in vivo* dsRNA injection experiment, 46 PL<sub>130–140</sub> *M. rosenbergii* males (each weighing 0.6–2.1 g) were selected according to the presence of genital papillae on the fifth walking legs and appendices masculinae on the second pleopods. The post-larvae were assigned to one of three treatment groups: *Mr-IAG* dsRNA injected (n = 16), GFP dsRNA injected (n = 15), and vehicle injected (n = 15). Each animal was housed in a separate floating fenestrated plastic container (80 cm<sup>2</sup>). Before the start of the experiment, the second pleopod

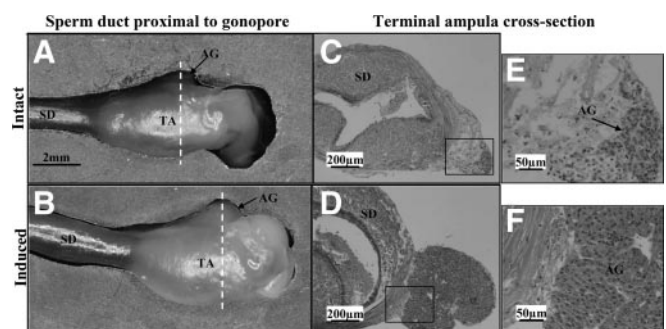

**FIG. 1.** Effects of endocrine manipulation through bilateral removal of the XO-SG complex on the reproductive system of the *M. rosenbergii* male. Proximal parts of the male reproductive systems of intact (A) and endocrinologically induced (B) *M. rosenbergii* males; hematoxylin and eosin-stained 5-μm cross-sections of the terminal ampullae (TA) of the intact (C) and endocrinologically induced (D) males, with the AG area magnified (E and F, respectively). Dashed lines in left panel denote plane of section. SD, Sperm duct.

```

nt 1      GGTATTCCAAGAGGGGCAAGACTCTGGGATCACACCTCGAACGGCTCTGTCCTTCCC
nt 61     CTCGTCGGTTTAAACCGGTGTTTTCTAGCCACGCTCTCAACACCTAAAAATTCCTCTCTT
nt 121    GCTTTCTGGCCAGCCTTGCAGTCATCCTTGAATTCCTCTCTTATATTTCCGGACAT
nt 181    AACATTCTTCTCCGGCCTTTTCATATCGAAGTGAACAAATCAACTACAGAATGGGAT
aa 1      M G Y
nt 241    ACTGGAATGCCGAGATCAAGTGTGTGTTGTTCTGCTCACTCGTAGCATCGCTTCTCCCTC
aa 4      W N A E I K C V L F C S L V A S L L P Q
nt 301    AACCTTCTTCGAGCATGAGATCGAATGCCTCTCCGTTGACTTTGACTGCGCGGACATAA
aa 24     P S S S Y E I E C L S V D F D C G D I T
nt 361    CGAACACCCTTCCCTCCGCTGCGCTGAGACACAACACTACATCAACCCAGGACCACCT
aa 44     N T L A S V C L R H N N Y I N P G P T Y
nt 421    ACGTTTCCAAGAGCGCAGCATCTGCTGACATCTATACCGTTCTCTACGAAGTCTCCAT
aa 64     V S K E R R S A D I Y T V P S T K S P S
nt 481    CGCTCGCCACCAGAGACTACCCACTTGACCATGGCTGACGAAGAACTCAGAAGGTAT
aa 84     L A H P R A T H L T M A D E E T Q K V S
nt 541    CTAAGTGGAGGAGGAGATTGACGACATGACGCTGAGCAGGGAAGAAGCGAACAATATGC
aa 104    K V E E E I Q H M T L S R E E A N N M L
nt 601    TGCATTCGAAGCTCGCTTCCGGAGGACAGCGTGAGGAGAAGTCCAAGGGAGGAATGCT
aa 124    H S K R R F R R D S V R R S P R E E C C
nt 661    GCAACAACGGCTCTTTCAGACGCTGCAACTTCGAGGAAGTCGCGGAATATTGCATCGAGC
aa 144    N N A S F R R C N F E E V A E Y C I E L
nt 721    TCGTCCCGCGTTAACACCTGCAGTTCAGGTAGGAGTCTCAAGGATCATCCCGTCCC
aa 164    R P G V N T C S S R *
nt 781    TGTCTATACTTGACAGGAGATGCTCAAAGTCAAATCACCGTCTTCGAGTCATGATGGG
nt 841    AATGACCTTCAGCTAAAGCTGCCTTTTGCTTTTCTCACAGTCAACTAAAAACAATTTTT
nt 901    TTTATCTACCGTTACCTTCAGATAAATTATCTTTGTCTCAGCTTTAATTTCCGGCTAA
nt 961    AGCTTTTTTTTTTGTCTACCCATGCATTAGCTAAAGCTTCTTTTGTTCGCCTTTAA
nt 1021   ATTCAACACTCCTCTGCCTTACCCTTATTTAGCTAATGGCTTCTTTTATTTTACCATT
nt 1081   ACCATCCACAAGCTTTGTTTGTCTTACCCTCAGCTGAAACGTTTGTGTCTCACCTT
nt 1141   TACCCTCAGCTAAAACCTTCTTTTGTCTTCCCGCTGCTTTAGTAAATGCTTCTTCTGTC
nt 1201   ACACTTTTACTTTTTCAGCTAGGATTCTTTTTTTTTTTTTTGGCACTTTTACCTTCAGCTAA
nt 1261   AGGGTACTATTGCTCACCCCTTGCCTTCTGCTAAAGGTTCCCTTTTGTCTCCACCCTTGCCT
nt 1321   TCAACTAAAGGTTCCCTTTTGTCTCACCCCTTGCCTTTCAGCTAAAGGTTCCCTTTTGTCTCAC
nt 1381   CCTTGCCTTTCAGCTAAAGGTTCCCTTTTGTCTCACCCCTTGCCTTTCAGCTAAAGGTTCCCTTT
nt 1441   TGTCTCACCCCTTGCCTTTCAGCTAAAGGTTCCATTGTCTCACCTTTCAGCTAAAG
nt 1501   GTTCCCTTTTGTCTCACCCCTTGCCTTTCAGCTAAAGGTTCCCTTTTGTCTCACCCCTTGCATCC
nt 1561   AACTAAAGGTTCCCTTTTACCTCTCTTTATCTTTAACTAAAGTTTTTGTTTTGTATCC
nt 1621   TTGCCCTCAGCCAAACGTTCTTTTGTTTTATCTTTACACGCAACAACATCTAGACATTC
nt 1681   CAAACATTAAAGCATATTGCATTATTATTGGTGATTCTTGTCTGATGTTCCGAAAAAATGT
nt 1741   TTGATACATCAGTTATACGCTCAAATAAATGCTTTTGAGAACCAGAAAAAAGAAAA
nt 1801   AAAAAAAAAAAAAAAAAAAAAA
    
```

**FIG. 2.** *Mr-IAG* cDNA sequence and deduced *Mr-IAG* protein according to the predicted open-reading frame. Putative signal peptide is shown in *bold type*. The putative B and A chains are *underlined*, the putative C peptide is *italicized and shaded*, the predicted arginine C-proteinase cleavage sites are *boxed*, and the stop codon is marked with an *asterisk*. In the 3' UTR, 9.6 tandem repeats of 34 nucleotides are *underlined* (differentially *dashed and dotted*); nucleotides that deviate from the consensus sequence are shown in *bold type*.

of each animal was removed, and the presence of the *appendix masculina* was confirmed under a light microscope. The pleopods were fixed, stained with eosin, and photographed. Twice a week (over a period of 18 d), each animal was injected with 5 μg dsRNA/g or 5 μg GFP dsRNA, or a similar volume of vehicle (a total of 12 injections). Molts were recorded daily, and weight accumulation was documented. Regeneration of the *ap-pendix masculina* was viewed under a dissecting stereoscope.

For the long-term *in vivo* experiment, the same procedure was repeated with 36 PL<sub>70–80</sub> males (each weighing 0.25–1.6 g), assigned to two equal-sized groups: *Mr-IAG* dsRNA injected (n = 18) and vehicle injected (n = 18). The injection regime comprised a total of 22 injections, with the injections being given three times a week over a period of 55 d. dsRNA was injected into the sinus between the third and fourth walking legs

### Statistical analysis

To evaluate the effect of dsRNA injection on the rate of *appendix masculina* regeneration and on the molt interval, a Cox proportional hazards regression model (43) was used. The model is expressed by:  $\mu(t; z) = \mu_0(t)\exp(\sum \beta_i z_i)$ , where  $\mu(t, z)$  is the *appendix masculina* regeneration rate, and  $\mu_0(t)$  is the baseline hazard function that can change over time (*t*). The regression coefficient to be estimated,  $\beta_s$ , represents the independent effect of dsRNA injection on *appendix masculina* regeneration rate. These analyses were performed with S-PLUS 2000 (Mathsoft, Needham, MA). The effect of dsRNA injection on molt increment was statistically analyzed by a paired *t* test using STATISTICA 6.1 software (StatSoft, Inc., Tulsa, OK).

### Results

The reproductive tract of endocrinologically induced males did not seem morphologically different from that of intact males (Fig. 1A); however, the AG of the endocrinologically induced males was visibly enlarged (Fig. 1B). In the intact male, a cross-section of the terminal ampullae with the adjacent AG showed loose connective tissue with a small cluster of glandular cells (Fig. 1, C and E). In the endocrinologically induced male, the AG showed an increased number of glandular cells occupying the loose connective tissue (Fig 1, D and F). The increase in cell number was accompanied by increase in cell size (12.30 ± 0.59 μm and 8.96 ± 1.08 μm in endocrinologically induced and intact males, respectively) as a result of hypertrophy of the AG in the endocrinologically induced males (Fig. 1, E and F).

A total of 30 enlarged hAGs from mature *M. rosenbergii* males was used to construct a cDNA subtractive library. Bioinformatic analysis of 20 DNA expressed sequence tags from this library revealed a 729-bp DNA sequence with high similarity to the A chain of the putative Cq-IAG (26). By means of 5' and 3' RACE, the full sequence of the cDNA termed *Mr-IAG* was found to be 1824-bp long (Fig.

2). The predicted untranslated regions (UTRs) included 233 bp in the 5'-UTR and 1070 bp in the 3'-UTR (Fig. 2; nt 1–233 and 755–1824, respectively), with 9.6 tandem repeats of a 34-nucleotide consensus sequence being found in the 3'-UTR (Fig. 2; nt 1250–1577). The predicted proteinaceous product of this cDNA is 173 aa with a predicted mass of 19.76 kDa. *Mr-IAG* has structural homology to the insulin-like family of proteins, namely a signal peptide in its N' terminus (27 aa), six cysteine residues aligned with other IGFs, and B and A chains (42 and 46 aa, respectively) separated by a C peptide (58 aa) with predicted arginine C-proteinase cleavage sites at both its N' and C' termini (Fig. 2).

The predicted B and A chains that form the putative mature protein, with a predicted mass of 9.98 kDa, were compared with those of other insulin-like factors that were also shown to be specifically transcribed in crustacean AGs (Fig. 3). The skeleton of cysteine residues, typical of the insulin family of hormones, was conserved in all five sequences and was thus schematically marked for predicted disulfide bonds (Fig. 3A). Two published sequences of the genus *Porcellio* (*Porcellio dilatatus*, accession no. BAC57013 and *Porcellio scaber*, accession no. AAO11675) shared high-sequence similarity (90.8% similarity in 76 aa, calculated by LALIGN server). A third member of the Isopoda, *Armadillidium vulgare* (accession no. BAA86893) exhibited relatively high-sequence similarity with the aforementioned two isopods (81.3% similarity in 75 aa with *P. dilatatus* and 78.7% similarity in 75 aa with *P. scaber*) and lower similarity with the two decapod sequences: Cq-IAG from *C. quadricarinatus* (25.0% similarity in 72 aa) and Mr-IAG from *M. rosenbergii* (28.9% similarity in 75 aa). The sequences of the decapod species shared little sequence similarity among themselves (29.1% in 86 aa) or with those of the two isopods *P. dilatatus* and *P. scaber*.

The sequences were subjected to the Clustal W algorithm, and a phylogram was calculated (Fig. 3B). The phylogram emphasizes the sequence similarity of the two isopods *P. dilatatus* and *P. scaber*, and the larger distance between them and the decapods. The sequence of the third isopod species *A. vulgare* occupies another branch, closer to the decapod species' sequences but, nevertheless, quite remote from them.

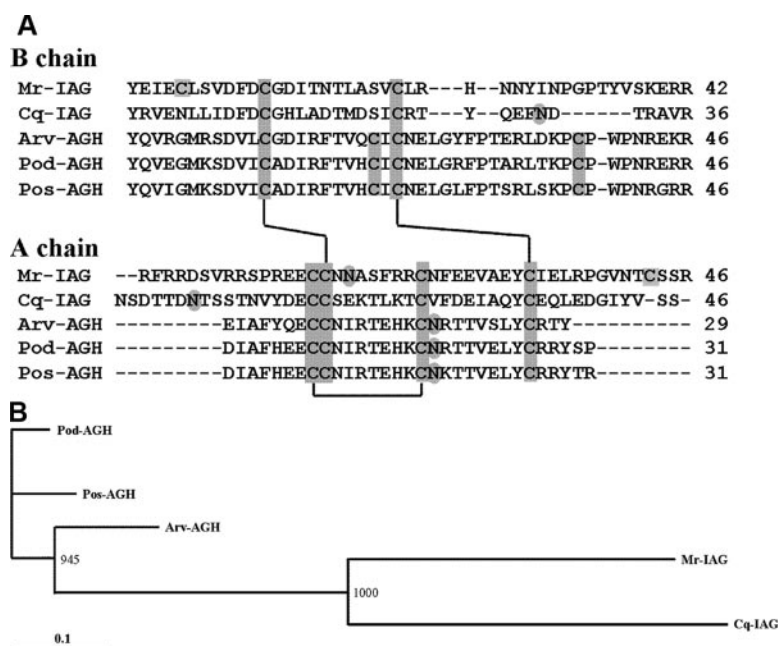

**FIG. 3.** Mr-IAG predicted B and A chain regions aligned and compared with other known Crustacean AG insulin-like sequences. A, Multiple sequence alignment of predicted mature AG specific factors from two decapods (*M. rosenbergii* and *C. quadricarinatus*) and mature AG hormones from three isopods (*A. vulgare* and predicted in *P. scaber* and *P. dilatatus*). The conserved cysteine residues are boxed where the two predicted interchain and one intrachain disulfide bonds are linked. Nonconserved cysteine residues in Mr-IAG are boxed. Predicted N-glycosylation sites are circled. B, A phylogram of all the known crustacean AG insulin-like sequences with distances (calculated by CLUSTAL\_X 1.83, presented by TreeView 1.6.6). Bar represents the number of substitutions per site.

The *Mr-IAG* transcript was shown by RT-PCR to be exclusively expressed in the AG of sexually mature *M. rosenbergii* males (Fig. 4A). RT-PCR showed no signal of this gene transcription in females (data not shown) or any other mature male tissues, including sperm duct, testis, thoracic ganglia, muscle, and hepatopancreas. In all the tissues examined, primers for  $\beta$ -actin of *M. rosenbergii* (accession no. AF221096) were used as a positive control for the RT-PCR procedure. The gene *Mar-SRR* (accession no. DQ066890), which was previously reported to be specifically transcribed in the sperm duct of *M. rosenbergii* (41), was also used as an internal positive control for unique transcription in the sperm duct and not in the AG. The size and AG specificity of the *Mr-IAG* transcript were further assessed using Northern blot analysis. The transcript exhibited a single band of approximately 1.9 kb exclusively in the AG, with no signal being detected in the sperm duct, testis, muscle, or hepatopancreas of the mature *M. rosenbergii* male. rRNA served to ensure the presence of RNA in the samples and was visible in all sampled tissues (Fig. 4B). Localization of *Mr-IAG in situ* further confirmed its AG-specific expression (Fig. 4C). A strong, specific signal was detected exclusively in AG cells using an antisense probe. No signal was detected when the sense-strand probe was used.

A short-term preliminary RNAi experiment (silencing via *in vivo* dsRNA injection), using GFP-dsRNA-injected and vehicle-injected control groups, revealed that the two control groups did not differ significantly from one another. Therefore, the long-term *in vivo* dsRNA injection assay included only a vehicle-injected control group and the *Mr-IAG*-dsRNA-injected group. In the long-term experiment, all individuals had molted at least three times by the end of the injection period (d 55), thus statistical analysis was applied only for the first three molt events. Figure 5A shows that cumulative molt events were significantly different between groups (Cox proportional hazards regression model; second molt  $z = 2.59$ ,  $P = 0.0097$ ; third molt  $z = 3.07$ ,  $P = 0.0021$ ). From the time of the first molt event, the *Mr-IAG*-dsRNA-injected group lagged in molt intervals behind the vehicle-injected group, with the most marked lag being that between the first and second molts (lowest exponent coefficient; Fig. 5A). The lag was sustained even after the end of the injection period. Weight accumulation was lower in the *Mr-IAG*-dsRNA-injected group, and this difference became statistically significant by the third molt event (paired *t* test,  $P = 0.0224$ ; Fig. 5B).

The second pleopods of representative individuals from the *Mr-IAG*-dsRNA-injected group and the vehicle-injected control group were removed at the start (Fig. 6, Aa and Ab, respectively) and at the end of the repeated injection period of the long-term experiment (Fig. 6, Ae and Af, respectively). The pleopods along with their second molt exuviae were stained with eosin (Fig. 6, Ac and Ad, respectively). Figure 6A demonstrates the lack of regeneration of the *appendix masculina* in the animals injected with *Mr-IAG* dsRNA (Fig. 6, Ac and Ae, top row), in contrast to the regeneration observed in the vehicle-

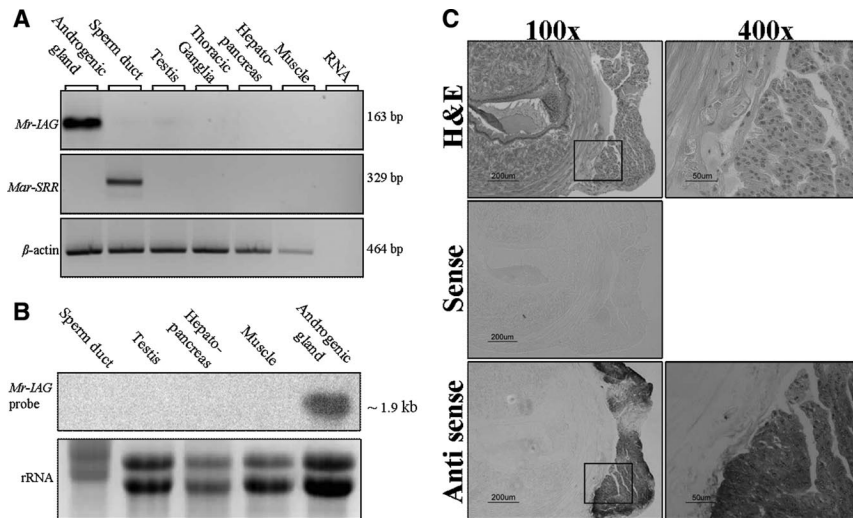

**FIG. 4.** *Mr-IAG* tissue-specific expression in mature *M. rosenbergii* males. **A**, *Mr-IAG* cDNA is specifically expressed in the AG, as shown by RT-PCR (top) along with *Mar-SRR* specific expression in the sperm duct (middle). RNA from the AG (top and bottom) and from sperm duct (middle) was used as a negative control. *M. rosenbergii*  $\beta$ -actin (bottom) was used as a positive control. **B**, Northern blot analysis showing an approximate 1.9-kb band exclusively in the AG (top). Each lane was loaded with 5  $\mu$ g total RNA, as indicated by the rRNA bands (bottom). **C**, Top to bottom, Hematoxylin and eosin (H&E)-stained sense and antisense probes hybridized with *Mr-IAG* *in situ*, in 5  $\mu$ m cross-sections of the sperm duct along with AG cells of a mature *M. rosenbergii* male. Hematoxylin and eosin and antisense are also shown at higher magnification ( $\times 400$ ; boxed areas  $\times 100$ ).

injected individuals (Fig. 6, Ad and Af, bottom row). The appendices masculinae on the right legs (which were not removed from the animals of both the groups, as control) remained intact. The appendices masculinae of the left leg regenerated exclusively in the vehicle-injected animals. By the 44th day, the appendices masculinae of all 18 control prawns had regenerated, whereas in the group of *Mr-IAG*-dsRNA-injected animals, the organs of only two individuals (out of 16) had regenerated by the end of the repeated injection period (by d 32 and 53 in those two animals). The lag in the regeneration of the appendices masculinae of the animals injected with *Mr-IAG* dsRNA was statistically significant and consistent over the entire injection period (Cox proportional hazards regression model;  $z = 4.03$ ;  $P < 0.001$ ). By 55 d after termination of the injections, the appendices masculinae of all the animals injected with *Mr-IAG* dsRNA had regenerated (Fig. 6B). Four weeks after the termination of the injection period, the differences between the groups were no longer statistically significant.

Serial dorsoventral sections of two representative individuals from the group of animals injected with *Mr-IAG* dsRNA and two from the vehicle-injected group were stained with hematoxylin and eosin (Fig. 7). Both individuals from the *Mr-IAG*-dsRNA-injected group showed a clear arrest of spermatogenesis, as indicated by the absence of spermatozoa in all sections of the sperm ducts and testes (Fig. 7, A and E). Overall, the testes of the animals receiving the *Mr-IAG* dsRNA injections were smaller than those of the vehicle-injected group (Fig. 7, E and F, respectively). The two individuals from the vehicle-injected group showed active spermatogenesis, as seen by the presence of many spermatozoa in the testis lobules and in the sperm ducts (Fig. 7, F and B). The spermatogenic arrest observed in the animals injected with *Mr-IAG* dsRNA was accompanied by hyperplasia and hypertrophy of AG

cells (Fig. 7C). The AG cells of the two prawns from the vehicle-injected group were fewer in number and smaller in size than those of the animals injected with the *Mr-IAG* dsRNA (Fig. 7, C and D). The number and size of the AG cells in the two vehicle-injected animals resembled those of intact males of the same age (data not shown).

## Discussion

It has previously been demonstrated that XO-SG removal leads to endocrinological induction of hAG in *M. rosenbergii*, as in other decapod crustacean species (34, 36). Histologically, hypertrophy of the AG is evident from a greater abundance of glandular cells and an increase in their volume (cell size). Such hAGs were used for the construction of a *M. rosenbergii* AG cDNA subtractive library. Scanning the clones of this hAG-enriched cDNA library revealed a cDNA encoding an insulin-like factor, termed *Mr-IAG*, based on its similarity to

the *Cq-IAG* sequence, the first AG-specific insulin-like factor to be found in decapods (26).

Previous reports of partial purification of peptides from *M. rosenbergii* AG revealed two polypeptides at approximately 16 and approximately 18 kDa (27). Neither of these peptides is likely to be the *Mr-IAG* because for *Mr-IAG* the predicted mass is approximately 9.98 and approximately 19.76 kDa for the mature and pre-pro-peptide, respectively, unless posttranslationally modified. In terms of its relatively higher abundance in the AG than in the vas deferens of *M. rosenbergii*, the approximate 9.98-kDa polypeptide extracted by Narksen *et al.* (44) should be further analyzed to determine whether it is related to the mature *Mr-IAG*.

The low-sequence similarity between the two decapod IAGs found thus far (*Cq-IAG* and *Mr-IAG*) indicates their evolutionary distance; nevertheless, all five crustacean insulin-like sequences determined to date share the typical skeleton of conserved cysteine residues of insulin-like proteins. In this regard, it is important to note that the three more closely related isopod species have two additionally conserved cysteine residues in their AG hormones (aa 21 and 38 of the B chain), enabling the formation of an additional intrachain disulfide bond (18). Another two, nonconserved cysteine residues are found exclusively in the *Mr-IAG* sequence (aa 5 of the B chain and 43 of the A chain), suggesting that a third interchain disulfide bond might occur in the putative protein. The occurrence of an additional two cysteine residues that might form a fourth disulfide bond in insulin-like peptides have been reported for the molluscan insulin-related peptide VII from *L. stagnalis* (19), and type  $\beta$ -insulins have been isolated from *C. elegans* (17).

Further research is needed to address the unusual length of *Mr-IAG* compared with cDNAs encoding insulin-like peptides.

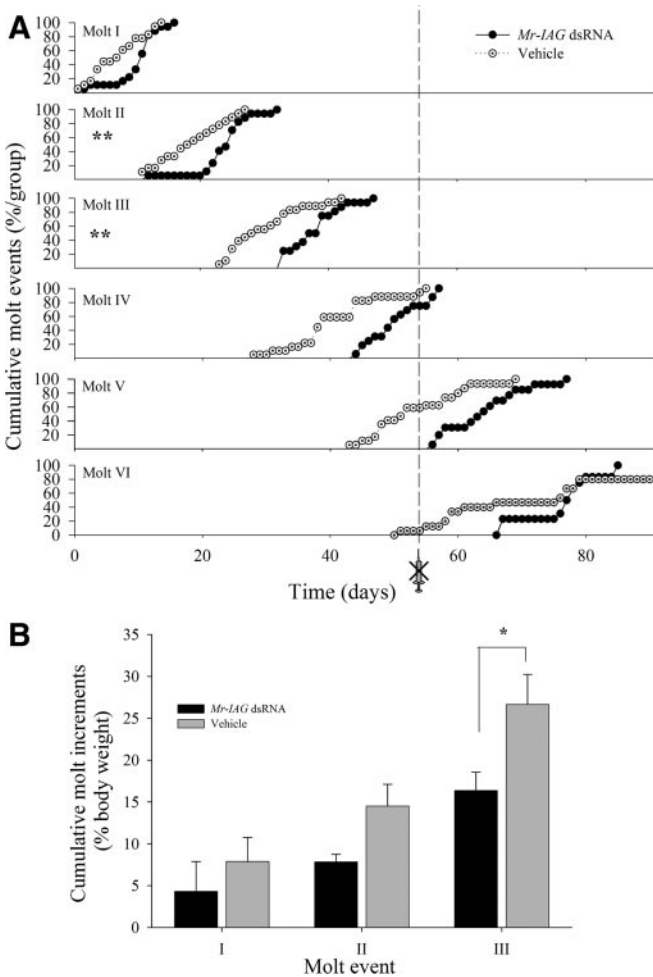

**FIG. 5.** Effects of *Mr-IAG* dsRNA injection on molt and growth of young *M. rosenbergii* males. A, Cumulative molt events of vehicle-injected (○, n = 18) and *Mr-IAG*-dsRNA-injected (●, n = 18) groups in the *in vivo* assay. Molted individuals are represented as a percentage of each group. The end of the repeated-injection period is marked as \* (d 55). Statistically significant differences (Cox proportional hazards regression model) are indicated with asterisks ( $P < 0.001$ ). B, Cumulative molt increment of vehicle-injected (□, n = 18) and *Mr-IAG*-dsRNA-injected (■, n = 18) groups during three molt events. Cumulative molt increment is expressed by  $100 \times$  weight after molt/weight at start of experiment. Bars represent SEM. Asterisk represents the statistically significant difference observed at the third molt event (paired *t* test,  $P = 0.0224$ ).

To the best of our knowledge, all known insulin-like peptides (excluding IGFs) are encoded by mRNA that does not exceed 1300 nucleotides (data gathered from 30 insulin-like peptides). Given the fact that most insulin-like peptides do not possess a tandem repeat in the 3'-UTR, as was observed for the uniquely long *Mr-IAG* and *Cq-IAG*, it is possible that the tandem repeat is responsible for their relatively long transcripts. The findings might indicate a posttranscription regulatory mechanism involving the 3'-UTR tandem repeats that is unique to the AG-specific insulin-like peptides of decapod crustaceans. Such 3'-UTR tandem repeats have been shown to mediate translation repression of *tra-2* mRNA in *C. elegans*, repression that is required to permit spermatogenesis in hermaphrodites of the species (45).

Evidence for the importance and evolutionary conservation of insulin-like peptides in the context of sex differentiation is scarce. The small amount of data that is available comes from scattered reports on tissue-specific expression in male sex-dif-

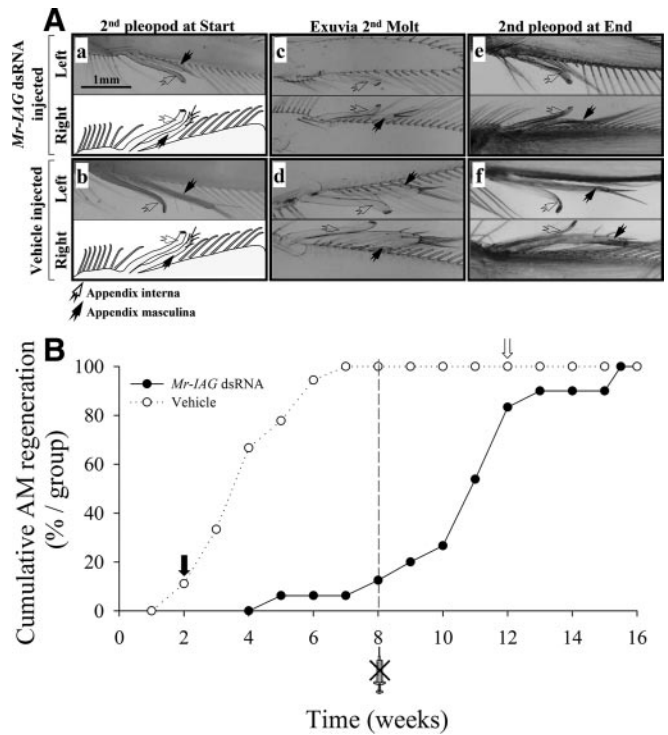

**FIG. 6.** Effects of *Mr-IAG* dsRNA injections on regeneration of *appendices masculinae* in young *M. rosenbergii* males. Aa and Ae, Left and right second pleopods of representative individuals from the group of animals injected with *Mr-IAG*-dsRNA before injection (a) and at the end of the experiment (e). Ab and Af, As for Aa and Ae for representative individuals from the vehicle-injected group. The exuviae from the second molt of each individual are shown in the middle column (c and d). B, Regeneration of the *appendix masculina* (AM) as a percentage of the population over 16 wk in *Mr-IAG*-dsRNA-injected (●, n = 18) and vehicle-injected (○, n = 18) groups. The end of the repeated injection period is marked as \* (d 55). Bold black arrow represents the point at which statistical differences between the two groups first appeared, and the white arrow, the point from which there was no statistical difference (i.e. recovery of the *appendices masculinae* in the *Mr-IAG* dsRNA-injected group).

ferentiating glands in taxa as far removed from each other as Crustacea [AGs (18, 21, 26)] and Mammalia [Leydig cells (46)]. Moreover, evidence for the necessity of insulin-like peptide receptors for normal development of male mice testis (47) strengthens the notion that insulin-like factors might have a role in sex differentiation, and the results reported in the present study add valuable information in this respect.

The arrest of spermatogenesis in the *Mr-IAG*-silenced individuals implies that *Mr-IAG* is involved in the maintenance of male reproductive activity because it shares effects that are somewhat similar to those seen in mice lacking the androgen receptor in their Leydig cells (48). Moreover, *Mr-IAG* silencing inhibited growth and the development of male secondary sex characteristics. The delay in growth parameters of *Mr-IAG*-silenced individuals implies that *Mr-IAG* might also act as a growth regulator, although its predicted structure does not resemble that of an IGF. The delay in molt intervals suggests that *Mr-IAG* could be a factor regulating ecdysteroid levels throughout the molt cycle, as is the case for several reported insulin-like peptides in insects (49–51).

The hypertrophy and hyperplasia observed in the AG cells after *Mr-IAG* silencing suggests that *Mr-IAG* might convey a feedback inhibition via an autocrine route, similar to insulin (52), or it might induce a sinus-gland-borne AG-inhibiting hor-

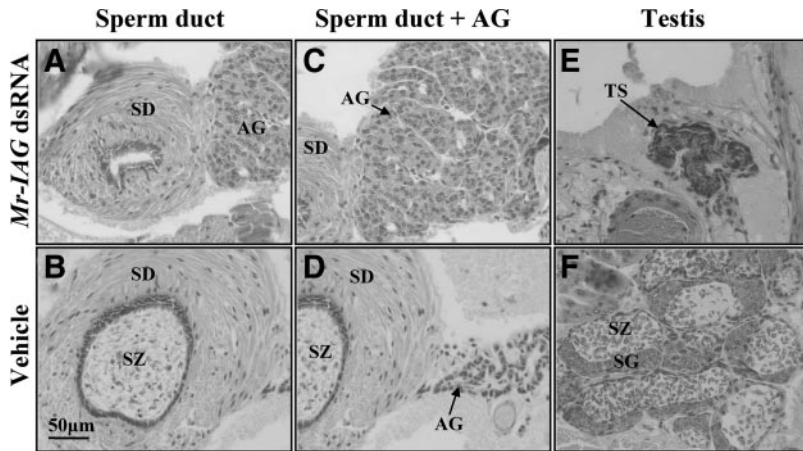

**FIG. 7.** Representative dorsoventral hematoxylin and eosin-stained sections in *Mr-IAG* silenced and control males. Dorsoventral sections of the fifth walking leg base (A–D) and the cephalothorax (E and F) of representative individuals from the *Mr-IAG*-dsRNA-injected group (A, C, and E) and the vehicle-injected group (B, D, and F). Cross-sections of the terminal ampulla region of the empty sperm duct (SD) shows hyperplastic and hypertrophied AG cells in an individual from the *Mr-IAG*-dsRNA-injected group (A and C), vis-à-vis the spermatozoa-filled sperm duct with normal AG cells in a vehicle-injected individual (B and D). Dorsal sections showing inactive testis lobules (TS) in an individual of the *Mr-IAG*-dsRNA-injected group (E), vis-à-vis the active testis lobules in the vehicle-injected individual (F), containing both spermatogonia (SG) and spermatozoa (SZ).

done by a long feedback loop, as is the case for ecdysone in the Y-organ and methyl farnesoate in the mandibular organ, whose synthesis is inhibited by sinus gland factors (34). The hAG might be compensatory, resulting in more glandular cells expressing the deficient factor, as reported in endocrine disorders such as congenital adrenal hyperplasia (53), multiple endocrine neoplasia (54), and goiter (55). In goiter syndrome, for instance, thyroxine deficiency results in elevated levels of TSH, which stimulates thyroid enlargement (55).

We hypothesize that a complete functional sex reversal from males to neo-females might be achievable by manipulating *Mr-IAG* at earlier stages, thereby bearing applied potential for the establishment of all-male populations (56) and improving economical performances of prawn farms (12). However, the importance of this study lies not only in its tremendous applied merit but also in the demonstration, for the first time, of a gender-specific insulin-like gene expressed in an endocrine gland (the AG) and involved in a variety of male-related phenomena, such as spermatogenesis, maintenance of secondary sex characters, and sex-specific growth patterns. All the evidence presented here suggests that *Mr-IAG* encodes a pivotal decapod crustacean AG hormone, whose mechanism of action should be further elucidated. In the long term, a “gain-of-function” type of experiment will be required for the final proof of an AG hormone.

## Acknowledgments

We thank Mr. Oren Levy and Mr. Ofek Landwirt for prawn maintenance, Dr. Isam Khalaila for sharing his surgical skills, Dr. Ofer Ovardia for advising with statistical analyses, Dr. Shmuel Parnes for his valuable suggestions while reading the manuscript, and Ms. Inez Mureinik for styling the manuscript.

Address all correspondence and requests for reprints to: Amir Sagi, Ph.D., Department of Life Sciences, Ben-Gurion University of the Negev, P.O. Box 653, Beer-Sheva 84105, Israel. E-mail: sagia@bgu.ac.il.

This study was supported in part by a grant from the European Community (FP6-2003-NEST-A/STREP 4800-PHARMAPOX).

Disclosure Statement: T.V. and A.S. are inventors on a provisional patent (Israel). R.M., E.D.A., S.W., S.R., and L.G. have nothing to declare.

## References

1. Charniaux-Cotton H 1962 Androgenic gland of crustaceans. *Gen Comp Endocrinol* 1:241–247
2. Charniaux-Cotton H, Payen G 1985 Sexual differentiation. In: Bliss DE, Mantel LH, eds. *The biology of crustacea*. New York: Academic Press; 217–299
3. Katakura Y 1989 Endocrine and genetic control of sex differentiation in the malacostracan Crustacea. *Invertebr Reprod Dev* 16:177–182
4. Sagi A 1988 The androgenic gland in crustacea—with emphasis on the cultured freshwater prawn *Macrobrachium rosenbergii*—a review. *Isr J Aquacult* Bamidgheh 40:9–16
5. Sagi A, Snir E, Khalaila I 1997 Sexual differentiation in decapod crustaceans: role of the androgenic gland. *Invertebr Reprod Dev* 31:55–61
6. Chang ES, Sagi A 2008 Male reproductive hormones. In: Mente E, ed. *Reproductive biology of crustaceans*. Enfield, NH: Science Publishers; 299–318
7. Charniaux-Cotton H 1954 [Implantation of gonads from the opposite sex to male and female *Orchestia gammarella*]. *C R Hebd Seances Acad Sci* 238: 953–955
8. Taketomi Y, Murata M, Miyawaki M 1990 Androgenic gland and secondary sexual characters in the crayfish *Procambarus clarkii*. *J Crus Biol* 10:492–497
9. Nagamine C, Knight AW, Maggenti A, Paxman G 1980 Masculinization of female *Macrobrachium rosenbergii* (de Man) (*Decapoda, Palaemonidae*) by androgenic gland implantation. *Gen Comp Endocrinol* 41:442–457
10. Sagi A, Cohen D 1990 Growth, maturation and progeny of sex-reversed *Macrobrachium rosenbergii* males. *World Aquacult* 21:87–90
11. Malecha SR, Nevin PA, Ha P, Barck LE, Lamadrid-Rose Y, Masuno S, Hedgecock D 1992 Sex-ratios and sex-determination in progeny from crosses of surgically sex-reversed freshwater prawns, *Macrobrachium rosenbergii*. *Aquaculture* 105:201–218
12. Nair CM, Salin KR, Raju MS, Sebastian M 2006 Economic analysis of monosex culture of giant freshwater prawn (*Macrobrachium rosenbergii* De Man): a case study. *Aquac Res* 37:949–954
13. Okumura T, Hara M 2004 Androgenic gland cell structure and spermatogenesis during the molt cycle and correlation to morphotypic differentiation in the giant freshwater prawn, *Macrobrachium rosenbergii*. *Zoolog Sci* 21:621–628
14. King DS 1964 Fine structure of the androgenic gland of the crab, *Pachygrapsus crassipes*. *Gen Comp Endocrinol* 4:533–544
15. Glenser H, Thomsen PF, Hebsgaard MB, Sorensen MV, Willerslev E 2006 Evolution. The origin of insects. *Science* 314:1883–1884
16. Riehle MA, Fan Y, Cao C, Brown MR 2006 Molecular characterization of insulin-like peptides in the yellow fever mosquito, *Aedes aegypti*: expression, cellular localization, and phylogeny. *Peptides* 27:2547–2560
17. Duret L, Guex N, Peitsch MC, Bairoch A 1998 New insulin-like proteins with atypical disulfide bond pattern characterized in *Caenorhabditis elegans* by comparative sequence analysis and homology modeling. *Genome Res* 8:348–353
18. Ohira T, Hasegawa Y, Tominaga S, Okuno A, Nagasawa H 2003 Molecular cloning and expression analysis of cDNAs encoding androgenic gland hormone precursors from two porcellionidae species, *Porcellio scaber* and *P. dilatatus*. *Zool Sci* 20:75–81
19. Smit AB, Spijker S, Van Minnen J, Burke JF, De Winter F, Van Elk R, Geraerts WP 1996 Expression and characterization of molluscan insulin-related peptide VII from the mollusc *Lymnaea stagnalis*. *Neuroscience* 70:589–596
20. Ebberink RHM, Smit AB, Van Minnen J 1989 The insulin family: evolution of structure and function in vertebrates and invertebrates. *Biol Bull* 177:176–182
21. Hasegawa Y, Haino-Fukushima K, Katakura Y 1987 Isolation and properties of androgenic gland hormone from the terrestrial isopod, *Armadillidium vulgare*. *Gen Comp Endocrinol* 67:101–110
22. Martin G, Juchault P, Sorokine O, Van Dorselaer A 1990 Purification and characterization of androgenic hormone from the terrestrial isopod *Armadil-*



- lidium vulgare* Latr. (Crustacea, Oniscidea). Gen Comp Endocrinol 80:349–354
23. Nagasawa H, Hasegawa Y, Haino-Fukushima K, Hatayama H, Yanagisawa T, Katakura Y 1995 Isolation and structural determination of seminal vesicle-specific peptides of the terrestrial isopod, *Armadillidium vulgare*. Biosci Biotechnol Biochem 59:1246–1250
  24. Okuno A, Hasegawa Y, Nagasawa H 1997 Purification and properties of androgenic gland hormone from the terrestrial isopod *Armadillidium vulgare*. Zool Sci 14:837–842
  25. Okuno A, Hasegawa Y, Ohira T, Katakura Y, Nagasawa H 1999 Characterization and cDNA cloning of androgenic gland hormone of the terrestrial isopod *Armadillidium vulgare*. Biochem Biophys Res Commun 264:419–423
  26. Manor R, Weil S, Oren S, Glazer L, Afalo ED, Ventura T, Chalifa-Caspi V, Lapidot M, Sagi A 2007 Insulin and gender: an insulin-like gene expressed exclusively in the androgenic gland of the male crayfish *Cherax quadricarinatus*. Gen Comp Endocrinol 150:326–336
  27. Sun PS, Weatherby TM, Dunlap MF, Arakaki KL, Zacarias DT, Malecha SR 2000 Developmental changes in structure and polypeptide profile of the androgenic gland of the freshwater prawn *Macrobrachium rosenbergii*. Aquacult Int 8:327–334
  28. Dorsett Y, Tuschl T 2004 siRNAs: applications in functional genomics and potential as therapeutics. Nat Rev Drug Discov 3:318–329
  29. Hui JHL, Tobe SS, Chan SM 2008 Characterization of the putative farnesoic acid O-methyltransferase (LvFAMeT) cDNA from white shrimp, *Litopenaeus vannamei*: evidence for its role in molting. Peptides 29:252–260
  30. Lugo JM, Morera Y, Rodriguez T, Huberman A, Ramos L, Estrada MP 2006 Molecular cloning and characterization of the crustacean hyperglycemic hormone cDNA from *Litopenaeus schmitti*. Functional analysis by double-stranded RNA interference technique. FEBS J 273:5669–5677
  31. Shechter A, Glazer L, Cheled S, Mor E, Weil S, Berman A, Bentov S, Afalo ED, Khalaila I, Sagi A 2008 A gastrolith protein serving a dual role in the formation of an amorphous mineral containing extracellular matrix. Proc Natl Acad Sci USA 105:7129–7134
  32. Tiu SH, Chan SM 2007 The use of recombinant protein and RNA interference approaches to study the reproductive functions of a gonad-stimulating hormone from the shrimp *Metapenaeus ensis*. FEBS J 274:4385–4395
  33. Bradley SP, Rastellini C, da Costa MA, Kowalik TF, Bloomenthal AB, Brown M, Cicalese L, Basadonna GP, Uknis ME 2005 Gene silencing in the endocrine pancreas mediated by short-interfering RNA. Pancreas 31:373–379
  34. Khalaila I, Manor R, Weil S, Granot Y, Keller R, Sagi A 2002 The eyestalk-androgenic gland-testis endocrine axis in the crayfish *Cherax quadricarinatus*. Gen Comp Endocrinol 121:147–156
  35. Khalaila I, Katz T, Abdu U, Yehezkel G, Sagi A 2001 Effects of implantation of hypertrophied androgenic glands on sexual characters and physiology of the reproductive system in the female red claw crayfish, *Cherax quadricarinatus*. Gen Comp Endocrinol 121:242–249
  36. Kim DH, Jo Q, Kim BK, Han CH 2002 Eyestalk ablation-induced androgenic gland activity and gonad development in the freshwater prawns *Macrobrachium nipponense* (De Haan, 1849). Invertebr Reprod Dev 42:35–42
  37. Thompson JD, Higgins DG, Gibson TJ 1994 CLUSTAL W: improving the sensitivity of progressive multiple sequence alignment through sequence weighting, positions-specific gap penalties and weight matrix choice. Nucleic Acids Res 22:4673–4680
  38. Thompson JD, Gibson TJ, Plewniak F, Jeanmougin F, Higgins DG 1997 The CLUSTAL\_X windows interface: flexible strategies for multiple sequence alignment aided by quality analysis tools. Nucleic Acids Res 25:4876–4882
  39. Page RDM 1996 TreeView: an application to display phylogenetic trees on personal computers. Comput Appl Biosci 12:357–358
  40. Zhu XJ, Dai ZM, Liu J, Yang WJ 2005 Actin gene in prawn, *Macrobrachium rosenbergii*: characteristics and differential tissue expression during embryonic development. Comp Biochem Physiol B Biochem Mol Biol 140:599–605
  41. Cao JX, Dai JQ, Dai ZM, Yin GL, Yang WJ 2007 A male reproduction-related kazal-type peptidase inhibitor gene in the prawn, *Macrobrachium rosenbergii*: molecular characterization and expression patterns. Mar Biotechnol (NY) 9:45–55
  42. Shechter A, Afalo ED, Davis C, Sagi A 2005 Expression of the reproductive female-specific vitellogenin gene in endocrinologically induced male and intersex *Cherax quadricarinatus* crayfish. Biol Reprod 73:72–79
  43. Kleinbaum DG, Klein M 2005 Survival analysis: a self-learning text. 2nd ed. New York: Springer
  44. Narksen W, Roytrakul S, Rungsin W, Promboon A, Ratanapo S 2005 Identification of androgenic hormone from giant freshwater prawn by HPLC-MALDI. In: 31st Congress on Science and Technology of Thailand, Suranaree University of Technology, Nakhon Ratchasima, Thailand
  45. Thompson SR, Goodwin EB, Wickens M 2000 Rapid deadenylation and poly(A)-dependent translational repression mediated by the *Caenorhabditis elegans* tra-2 3' untranslated region in *Xenopus* embryos. Mol Cell Biol 20:2129–2137
  46. Zimmermann S, Schwarzler A, Buth S, Engel W, Adham IM 1998 Transcription of the Leydig insulin-like gene is mediated by steroidogenic factor-1. Mol Endocrinol 12:706–713
  47. Nef S, Verma-Kurvari S, Merenmies J, Vassalli JD, Efstratiadis A, Accili D, Parada LF 2003 Testis determination requires insulin receptor family function in mice. Nature 426:291–295
  48. Xu QQ, Lin HY, Yeh SD, Yu IC, Wang RS, Chen YT, Zhang CX, Altuwaijri S, Chen LM, Chuang KH, Chiang HS, Yeh SY, Chang CS 2007 Infertility with defective spermatogenesis and steroidogenesis in male mice lacking androgen receptor in Leydig cells. Endocrine 32:96–106
  49. Kiriishi S, Nagasawa H, Kataoka H, Suzuki A, Sakurai S 1992 Comparison of the in vivo and in vitro effects of bombyxin and prothoracicotropic hormone on prothoracic glands of the silkworm, *Bombyx-Mori*. Zool Sci 9:149–155
  50. Riehle MA, Brown MR 1999 Insulin stimulates ecdysteroid production through a conserved signaling cascade in the mosquito *Aedes aegypti*. Insect Biochem Mol Biol 29:855–860
  51. Simonet G, Poels J, Claeys I, Van Loy T, Franssens V, De Loof A, Vanden Broeck J 2004 Neuroendocrinological and molecular aspects of insect reproduction. J Neuroendocrinol 16:649–659
  52. Muller D, Huang GC, Amiel S, Jones PM, Persaud SJ 2006 Identification of insulin signaling elements in human  $\beta$ -cells: autocrine regulation of insulin gene expression. Diabetes 55:2835–2842
  53. Charmandari E, Brook CG, Hindmarsh PC 2004 Classic congenital adrenal hyperplasia and puberty. Eur J Endocrinol 151(Suppl 3):U77–U82
  54. Stalberg P, Santesson M, Ekeblad S, Lejondou MH, Skogseid B 2006 Recognizing genes differentially regulated in vitro by the multiple endocrine neoplasia type 1 (MEN1) gene, using RNA interference and oligonucleotide microarrays. Surgery 140:921–930
  55. Biondi B, Cooper DS 2008 The clinical significance of subclinical thyroid dysfunction. Endocr Rev 29:76–131
  56. Afalo ED, Hoang TTT, Nguyen VH, Lam Q, Nguyen DM, Trinh QS, Raviv S, Sagi A 2006 A novel two-step procedure for mass production of all-male populations of the giant freshwater prawn *Macrobrachium rosenbergii*. Aquaculture 256:468–478
